# Supplementary material for: How to Implement User-Friendly BLMs in the Absence of DOC Monitoring Data: A Case Study on Bulgarian Surface Waters
Source: MDPI journal article supplement (doi:10.3390/w14020246), 2022-01-15
Supplement: s1 [file s1]

# How to implement user-friendly BLMs in the absence of DOC monitoring data: A case study on Bulgarian surface waters

Tony Venelinov <sup>1</sup> and Stefan Tsakovski <sup>2,\*</sup>

- <sup>1</sup> University of Architecture, Civil Engineering and Geodesy, Faculty of Hydraulic Engineering, Chair of Water Supply, Sewerage, Water and Wastewater Treatment, 1 Hr. Smirnenki Blvd., 1046 Sofia, Bulgaria; TVenelinov\_fhe@uacg.bg
- <sup>2</sup> Sofia University St. Kliment Ohridski, Faculty of Chemistry and Pharmacy, Chair of Analytical Chemistry, 1 J. Bourchier Blvd., 1164 Sofia, Bulgaria
- \* Correspondence: STsakovski@chem.uni-sofia.bg (S.T.)

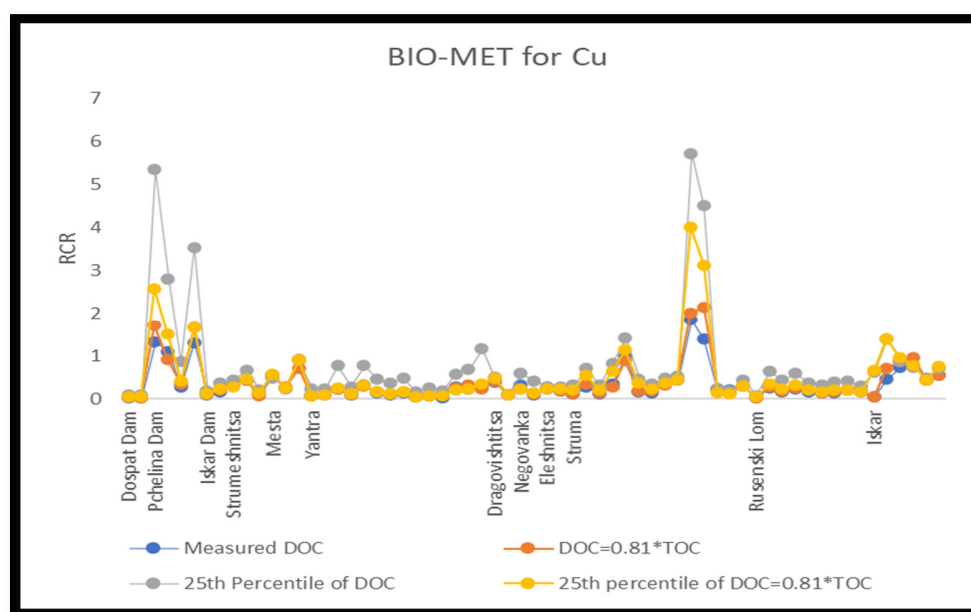

**Figure S1.** Calculated RCR for Cu using BIO-MET and measured DOC, TOC, the 25<sup>th</sup> percentile of the Bulgarian DOC data and the 25<sup>th</sup> percentile of the DOC=0.81\*TOC for the respective waterbody as inputs.

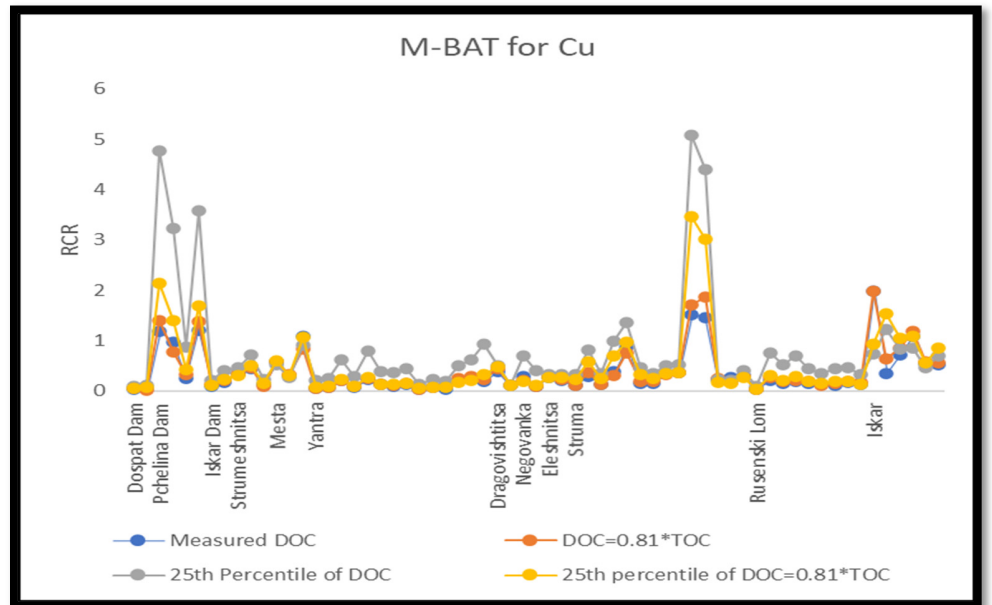

**Figure S2.** Calculated RCR for Cu using M-BAT and measured DOC, TOC, the 25<sup>th</sup> percentile of the Bulgarian DOC data and the 25<sup>th</sup> percentile of the  $\text{DOC}=0.81*\text{TOC}$  for the respective waterbody as inputs.

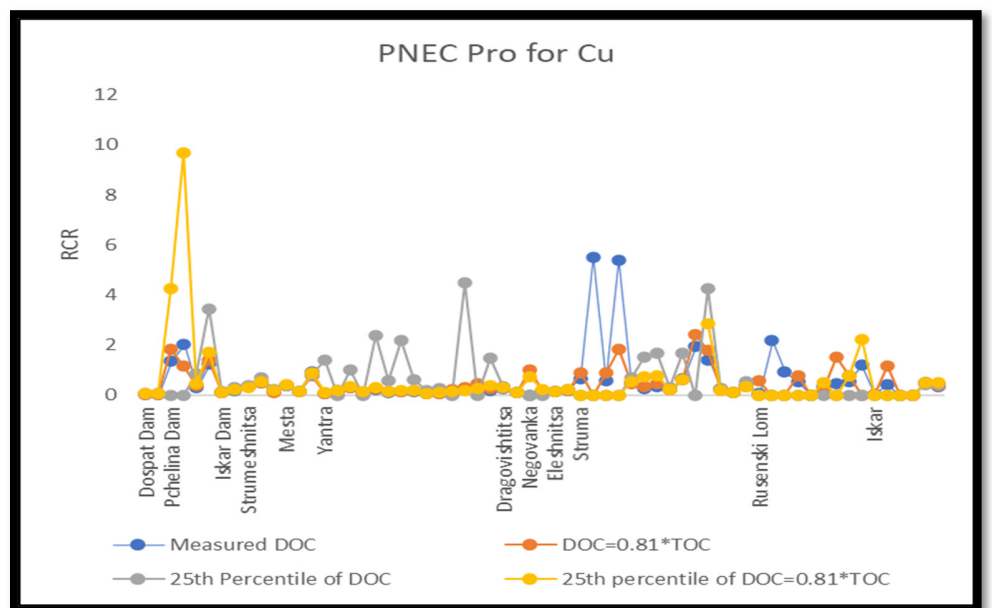

**Figure S3.** Calculated RCR for Cu using PNEC Pro and measured DOC, TOC, the 25<sup>th</sup> percentile of the Bulgarian DOC data and the 25<sup>th</sup> percentile of the  $\text{DOC}=0.81*\text{TOC}$  for the respective waterbody as inputs.

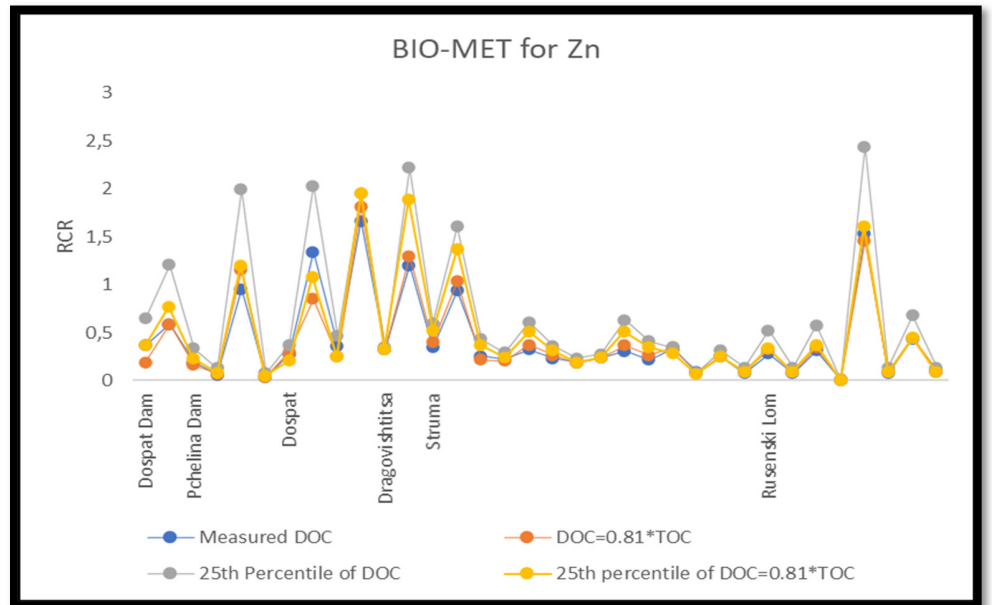

**Figure S4.** Calculated RCR for Zn using BIO-MET and measured DOC, TOC, the 25<sup>th</sup> percentile of the Bulgarian DOC data and the 25<sup>th</sup> percentile of the  $\text{DOC}=0.81*\text{TOC}$  for the respective waterbody as inputs.

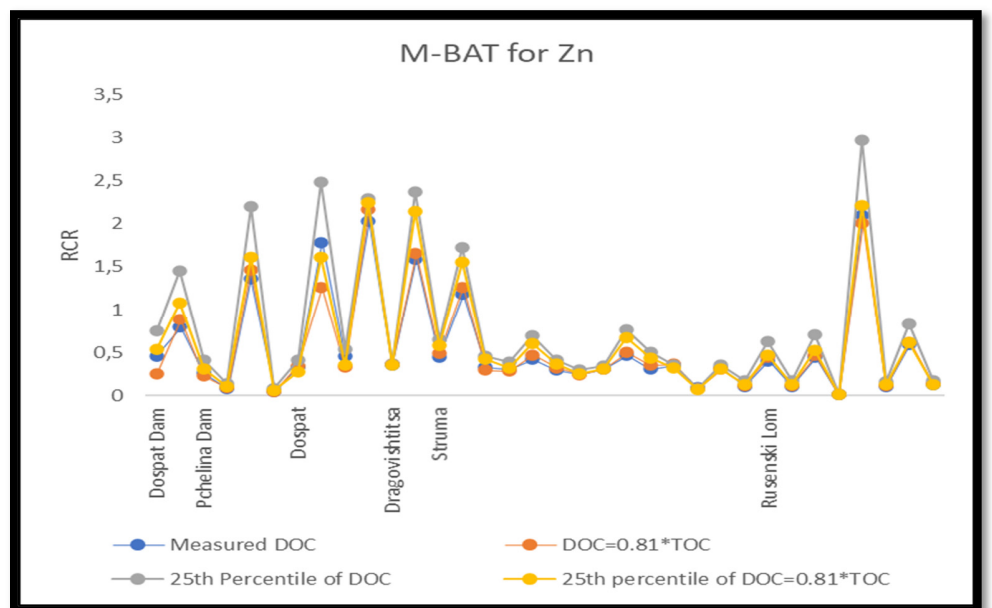

**Figure S5.** Calculated RCR for Zn using M-BAT and measured DOC, TOC, the 25<sup>th</sup> percentile of the Bulgarian DOC data and the 25<sup>th</sup> percentile of the  $\text{DOC}=0.81*\text{TOC}$  for the respective waterbody as inputs.

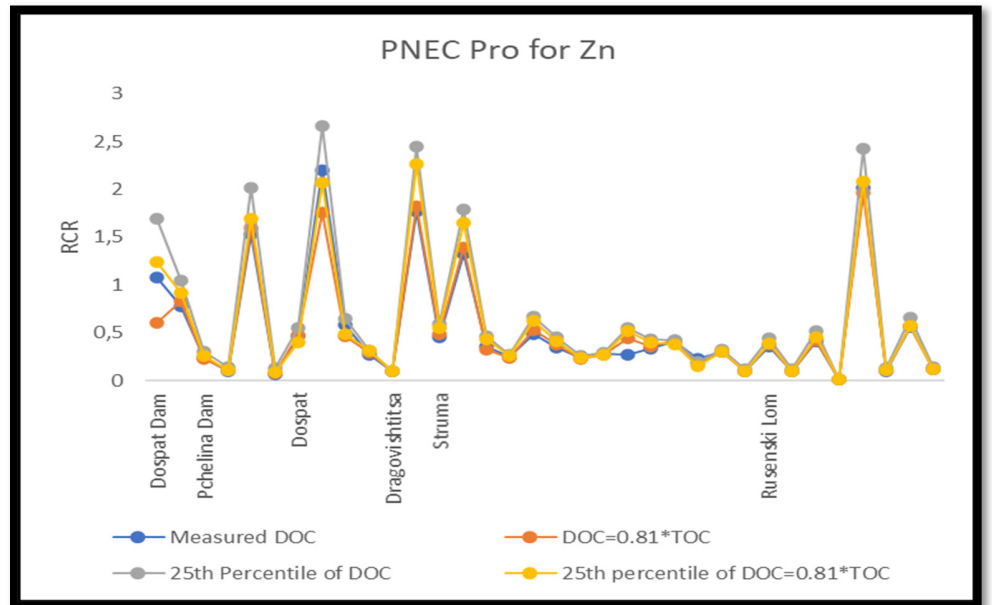

**Figure S6.** Calculated RCR for Zn using PNEC Pro and measured DOC, TOC, the 25<sup>th</sup> percentile of the Bulgarian DOC data and the 25<sup>th</sup> percentile of the DOC=0.81\*TOC for the respective waterbody as inputs.

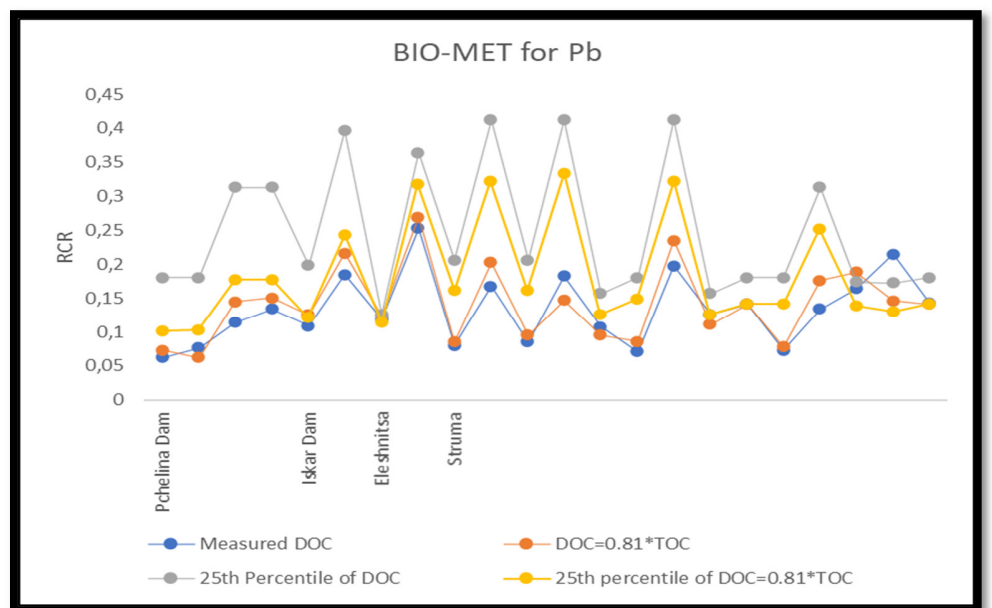

**Figure S7.** Calculated RCR for Pb using BIO-MET and measured DOC, TOC, the 25<sup>th</sup> percentile of the Bulgarian DOC data and the 25<sup>th</sup> percentile of the DOC=0.81\*TOC for the respective waterbody as inputs.

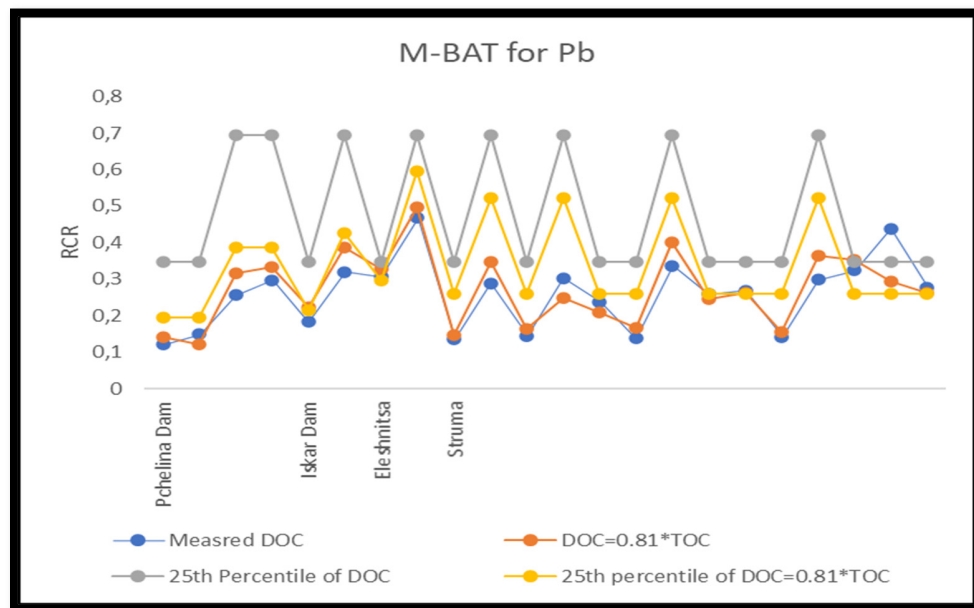

**Figure S8.** Calculated RCR for Pb using M-BAT and measured DOC, TOC, the 25<sup>th</sup> percentile of the Bulgarian DOC data and the 25<sup>th</sup> percentile of the  $\text{DOC}=0.81 \cdot \text{TOC}$  for the respective waterbody as inputs.

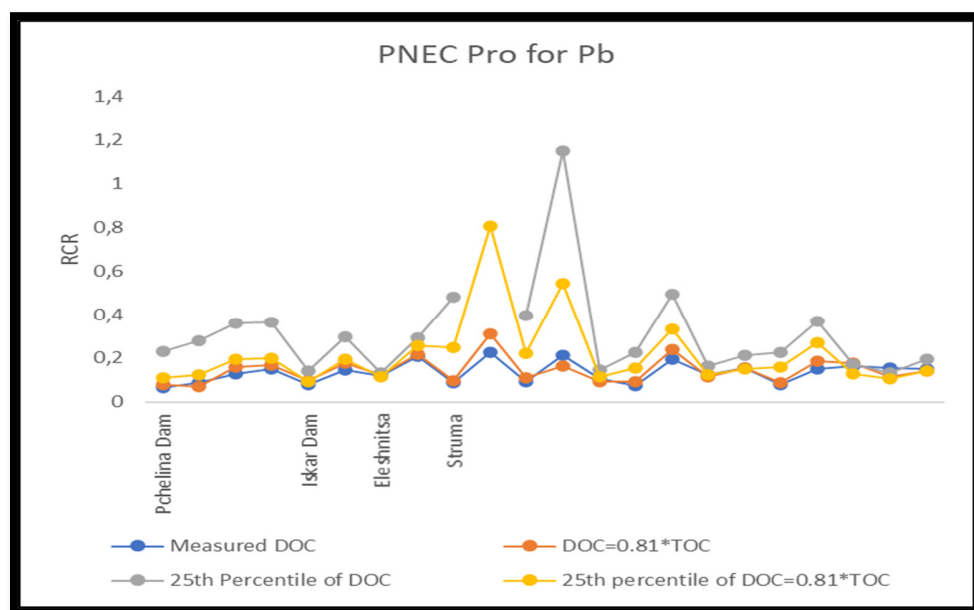

**Figure S9.** Calculated RCR for Pb using PNEC Pro and measured DOC, TOC, the 25<sup>th</sup> percentile of the Bulgarian DOC data and the 25<sup>th</sup> percentile of the  $\text{DOC}=0.81 \cdot \text{TOC}$  for the respective waterbody as inputs.
